# Supplementary material
Source: MDPI journal article supplement (https://www.mdpi.com/2813-0618/2/2/14)
Supplement: s1 [file s1]

**Table S1. Geographical distributions of general physicians' (GPs) characteristics from 2000 to 2019**

|                                                                                             | 2000             |                  |                   |                  |                  |                  |                    |                    |
|---------------------------------------------------------------------------------------------|------------------|------------------|-------------------|------------------|------------------|------------------|--------------------|--------------------|
| LHU                                                                                         | Milano City      | Insubria         | Montagna          | Brianza          | Bergamo          | Brescia          | Val Padana         | Pavia              |
| Age, years, mean (SD)                                                                       | 47.3 (8.2)       | 47.1 (7.6)       | 47.3 (6.6)        | 47.1 (7.3)       | 47.1 (7.3)       | 47.1 (7.3)       | 48.0 (6.9)         | 47.1 (7.2)         |
| Sex, Male, n (%)                                                                            | 1805 (68.6)      | 740 (71.0)       | 207 (79.6)        | 613 (72.5)       | 559 (75.0)       | 544 (73.8)       | 423 (75.0)         | 317 (76.8)         |
| Patients in charge, median (IQR range)                                                      | 702 (433-857)    | 693 (457-824)    | 657.5 (457-776.5) | 719 (437-841)    | 705 (460-803)    | 740 (524-837)    | 739 (518.5-869)    | 711 (451-874)      |
| Proportion of older patients in charge ( $\geq 65$ years), median (IQR range)               | 33.5 (27.4-39.2) | 33.5 (28.9-37.6) | 34.1 (30.0-38.0)  | 31.4 (26.9)      | 30.7 (26.3-35.6) | 32.2 (27.5-36.6) | 37.3 (32.4-41.8)   | 38.6 (33.9-42.6)   |
| Proportion of patients with polypharmacy therapy in charge, median (IQR range)              | 17.5 (13.8-21.5) | 15.5 (12.2-19.5) | 15.2 (10.6-20.6)  | 16.0 (12.9-19.2) | 18.3 (15.0-22.1) | 19.6 (15.9-23.6) | 19.2 (15.4-22.6)   | 19.7 (16.0-23.9)   |
| Mean number of different antibiotics prescribed per patient in the year, median (IQR range) | 1.9 (1.8-2.0)    | 1.9 (1.7-2.0)    | 1.8 (1.7-2.1)     | 1.9 (1.8-2.0)    | 2.0 (1.8-2.1)    | 2.0 (1.9-2.2)    | 1.8 (1.7-1.9)      | 2.0 (1.8-2.1)      |
| Mean number of DDD of antibiotics prescribed per patient in the years, median (IQR range)   | 41.0 (35.2-47.5) | 38.9 (33.7-45.9) | 39.5 (33.9-47.6)  | 40.4 (34.8-46.9) | 40.1 (34.1-47.5) | 41.6 (35.1-47.7) | 36.8 (32.2-43.1)   | 41.3 (35.7-49.0)   |
| Mean number of antibiotic refill for month per patient, median (IQR range)                  | 1.3 (1.2-1.5)    | 1.3 (1.2-1.5)    | 1.3 (1.1-1.5)     | 1.4 (1.2-1.6)    | 1.4 (1.2-1.6)    | 1.4 (1.2-1.5)    | 1.3 (1.1-1.5)      | 1.4 (1.3-1.6)      |
| Mean number of antibiotic switches for month per patient, median (IQR range)                | 1.2 (1.1-1.3)    | 1.2 (1.1-1.3)    | 1.2 (1.1-1.3)     | 1.2 (1.1-1.3)    | 1.2 (1.1-1.3)    | 1.2 (1.1-1.3)    | 1.2 (1.1-1.3)      | 1.3 (1.2-1.4)      |
|                                                                                             | 2010             |                  |                   |                  |                  |                  |                    |                    |
| Age, years, mean (SD)                                                                       | 54.6 (5.7)       | 54.5 (5.9)       | 55.0 (6.2)        | 54.9 (5.7)       | 54.4 (5.7)       | 54.4 (5.7)       | 55.1 (5.6)         | 54.3 (5.8)         |
| Sex, Male, n (%)                                                                            | 1512 (64.6)      | 670 (67.4)       | 188 (76.7)        | 539 (69.2)       | 515 (70.6)       | 507 (69.4)       | 378 (70.5)         | 310 (73.1)         |
| Patients in charge, median (IQR range)                                                      | 913 (675-1029)   | 885.5 (654-990)  | 819 (642-951)     | 930 (737-1016)   | 899 (260.5-899)  | 924 (750-1003)   | 897.5 (692-1006.5) | 838 (546.5-1004.5) |
| Proportion of older patients in charge ( $\geq 65$ years), median (IQR range)               | 35.7 (30.4-40.6) | 35.0 (31.0-38.9) | 35.2 (31.3-37.8)  | 34.3 (30.2-38.1) | 31.8 (27.6-36.0) | 33.5 (28.3-38.0) | 36.4 (32.7-40.1)   | 37.5 (33.1-41.9)   |
| Proportion of patients with polypharmacy therapy in charge, median (IQR range)              | 23.7 (19.3-28.3) | 22.8 (18.9-26.6) | 23.0 (19.5-26.5)  | 23.1 (19.9-27.1) | 22.8 (19.3-26.7) | 25.3 (20.8-29.0) | 26.6 (23.2-30.8)   | 25.9 (22.5-30.3)   |
| Mean number of different antibiotics prescribed per patient in the year, median (IQR range) | 1.9 (1.8-2.1)    | 1.9 (1.8-2.0)    | 1.9 (1.8-2.1)     | 1.9 (1.8-2.1)    | 1.9 (1.8-2.1)    | 2.1 (1.9-2.2)    | 1.9 (1.8-2.0)      | 2.0 (1.9-2.1)      |
| Mean number of DDD of antibiotics prescribed per patient in the years, median (IQR range)   | 21.4 (14.1-25.9) | 22.1 (15.9-27.1) | 19.0 (0-25.5)     | 21.6 (12.7-26.5) | 21.2 (10.5-25.8) | 21.1 (14.9-25.8) | 20.2 (13.1-23.8)   | 21.3 (11.9-26.0)   |
| Mean number of antibiotic refill for month per patient, median (IQR range)                  | 1.2 (0-1.4)      | 1.2 (1-1.4)      | 1.2 (0-1.4)       | 1.2 (1.0-1.4)    | 1.2 (0-1.4)      | 1.2 (1.0-1.4)    | 1.2 (0.0-1.4)      | 1.3 (0.0-1.4)      |
| Mean number of antibiotic switches for month per patient, median (IQR range)                | 1.1 (0.0-1.2)    | 1.1 (1.0-1.2)    | 1.0 (0.0-1.2)     | 1.1 (0.0-1.2)    | 1.1 (0.0-1.2)    | 1.1 (1.0-1.2)    | 1.1 (0.0-1.2)      | 1.2 (0.0-1.3)      |
|                                                                                             | 2018             |                  |                   |                  |                  |                  |                    |                    |
| Age, years, mean (SD)                                                                       | 59.6 (7.5)       | 59.4 (7.5)       | 58.4 (8.9)        | 59.3 (8.1)       | 58.9 (7.8)       | 57.6 (9.3)       | 60.4 (7.6)         | 59.6 (7.6)         |
| Sex, Male, n (%)                                                                            | 1427 (60.1)      | 611 (61.8)       | 154 (71.3)        | 501 (63.8)       | 476 (66.4)       | 488 (63.9)       | 364 (68.2)         | 284 (67.6)         |
| Patients in charge, median (IQR range)                                                      | 1011 (756-1095)  | 991 (758-1072)   | 992 (846.5-1071)  | 1027 (865-1091)  | 984 (815-1056)   | 985.5 (827-1059) | 961.5 (756-1063)   | 919.5 (561.5-1073) |
| Proportion of older patients in charge ( $\geq 65$ years), median (IQR range)               | 37.1 (31.6-41.2) | 37.7 (33.1-41.2) | 38.1 (35.3-41.6)  | 37.2 (32.2-40.8) | 35.4 (30.4-39.2) | 35.8 (30.6-40.0) | 38.5 (34.0-42.1)   | 38.7 (33.0-42.7)   |
| Proportion of patients with polypharmacy therapy in charge, median (IQR range)              | 25.8 (20.1-30.5) | 24.7 (20.3-28.7) | 25.3 (21.9-29.4)  | 25.9 (21.1-30.0) | 25.6 (21.4-29.8) | 25.5 (21.2-29.4) | 29.7 (25.2-34.3)   | 29.8 (25.7-34.4)   |
| Mean number of different antibiotics prescribed per patient in the year, median (IQR range) | 1.3 (1.2-1.3)    | 1.3 (1.2-1.3)    | 1.3 (1.2-1.3)     | 1.3 (1.2-1.3)    | 1.3 (1.2-1.3)    | 1.3 (1.2-1.3)    | 1.3 (1.2-1.3)      | 1.3 (1.2-1.3)      |
| Mean number of DDD of antibiotics prescribed per patient in the years, median (IQR range)   | 24.1 (20.4-28.4) | 25.3 (21.4-29.3) | 23.8 (19.9-27.6)  | 24.9 (21.0-29.2) | 24.4 (21.0-28.7) | 24.0 (20.9-28.2) | 22.8 (19.9-26.4)   | 23.9 (20.4-28.3)   |

|                                                                                             |                   |                  |                  |                  |                  |                  |                   |                  |
|---------------------------------------------------------------------------------------------|-------------------|------------------|------------------|------------------|------------------|------------------|-------------------|------------------|
| Mean number of antibiotic refill for month per patient, median (IQR range)                  | 1.3 (1.2-1.4)     | 1.3 (1.2-1.5)    | 1.2 (1.2-1.6)    | 1.3 (1.2-1.5)    | 1.3 (1.2-1.5)    | 1.4 (1.2-1.5)    | 1.3 (1.2-1.5)     | 1.4 (1.2-1.5)    |
| Mean number of antibiotic switches for month per patient, median (IQR range)                | 1.2 (1.1-1.2)     | 1.2 (1.1-1.3)    | 1.2 (1.1-1.3)    | 1.1 (1.1-1.29)   | 1.2 (1.1-1.2)    | 1.2 (1.1-1.3)    | 1.2 (1.1-1.2)     | 1.2 (1.1-1.3)    |
|                                                                                             | <b>2019</b>       |                  |                  |                  |                  |                  |                   |                  |
| Age, years, mean (SD)                                                                       | 60.2 (7.7)        | 59.9 (8.0)       | 58.5 (9.3)       | 59.6 (8.6)       | 59.5 (8.0)       | 58.1 (9.4)       | 60.5 (8.3)        | 60.2 (7.8)       |
| Sex, Male, n (%)                                                                            | 1386 (59.4)       | 600 (61.1)       | 126 (67.7)       | 483 (62.9)       | 463 (65.3)       | 473 (64.1)       | 354 (66.5)        | 271 (66.4)       |
| Patients in charge, median (IQR range)                                                      | 1075.5 (819-1154) | 1037 (773-1112)  | 1024 (885-1096)  | 1067 (901-1128)  | 1014 (851-1083)  | 1022 (881-1089)  | 1000 (771.5-1104) | 984.5 (579-1121) |
| Proportion of older patients in charge ( $\geq 65$ years), median (IQR range)               | 36.7 (31.0-40.9)  | 37.5 (32.5-40.8) | 38.4 (35.3-41.8) | 37.2 (32.0-40.8) | 35.5 (30.3-39.5) | 35.9 (30.1-39.7) | 38.0 (33.0-42.0)  | 37.7 (31.0-42.4) |
| Proportion of patients with polypharmacy therapy in charge, median (IQR range)              | 24.4 (18.8-29.3)  | 23.9 (19.5-28.0) | 25.4 (22.2-29.3) | 25.1 (20.9-29.5) | 25.2 (20.6-29.2) | 24.3 (20.1-28.8) | 28.9 (23.7-33.6)  | 29.4 (25.0-33.5) |
| Mean number of different antibiotics prescribed per patient in the year, median (IQR range) | 1.8 (1.6-1.9)     | 1.8 (1.7-1.9)    | 1.8 (1.7-2.0)    | 1.8 (1.7-1.9)    | 1.8 (1.7-1.9)    | 1.9 (1.8-2.0)    | 1.8 (1.7-1.9)     | 1.9 (1.7-2.0)    |
| Mean number of DDD of antibiotics prescribed per patient in the years, median (IQR range)   | 32.2 (26.1-37.6)  | 33.4 (27.3-38.7) | 30.0 (21.2-36.8) | 32.2 (25.4-38.1) | 33.0 (25.0-38.7) | 32.4 (10.5-38.4) | 29.8 (22.3-35.1)  | 31.9 (26.0-38.5) |
| Mean number of antibiotic refill for month per patient, median (IQR range)                  | 1.3 (1.1-1.5)     | 1.3 (1.1-1.5)    | 1.3 (1.1-1.5)    | 1.3 (1.1-1.5)    | 1.3 (1.0-1.5)    | 1.3 (0.0-1.5)    | 1.3 (1.0-1.5)     | 1.4 (1.2-1.6)    |
| Mean number of antibiotic switches for month per patient, median (IQR range)                | 1.1 (1.0-1.2)     | 1.1 (1.0-1.3)    | 1.1 (1.0-1.3)    | 1.1 (1.0-1.2)    | 1.1 (1.0-1.2)    | 1.2 (1.1-1.3)    | 1.1 (1.0-1.2)     | 1.2 (1.1-1.3)    |

LHU: Local Health Unit; IQR: Inter Quartile Range; DDD: Defined Daily Dose
